# Supplementary material
Source: MDPI journal article supplement (https://www.mdpi.com/2073-4441/15/8/1564)
Supplement: s1 [file s1]

# Supplementary Material

## Integrated Use of Bioaccumulation, Genotoxic, and Haematological Endpoints to Assess the Effect of Water Remediation Strategies on Fish Health: A Complementary Study

Cláudia Leopoldina Mieiro <sup>1,2,\*</sup>, João Pedro Coelho <sup>3</sup>, Ana Teresa Reis <sup>4,5</sup>, Diana Castro <sup>6</sup>, Paula Figueira <sup>7,8</sup>, Filipe Martinho <sup>2</sup>, Miguel A. Pardal <sup>2</sup>, Eduarda Pereira <sup>7</sup>, Mário Pacheco <sup>1</sup> and Cláudia B. Lopes <sup>7,9</sup>

- <sup>1</sup> CESAM—Centre for Environmental and Marine Studies & Department of Biology, University of Aveiro, 3810-193 Aveiro, Portugal
  - <sup>2</sup> Centre for Functional Ecology (CFE), TERRA Associate Laboratory, Department of Life Sciences, University of Coimbra, Calçada Martim de Freitas, 3000-456 Coimbra, Portugal
  - <sup>3</sup> ECOMARE-Laboratory for Innovation and Sustainability of Marine Biological Resources, CESAM-Centre for Environmental and Marine Studies, Department of Biology, University of Aveiro, Estrada do Porto de Pesca Costeira, 3830-565 Gafanha da Nazaré, Portugal
  - <sup>4</sup> EPIUnit-Instituto de Saúde Pública, Universidade do Porto, Rua das Taipas, 135, 4050-600 Porto, Portugal
  - <sup>5</sup> Department of Environmental Health, Portuguese National Institute of Health, Rua Alexandre Herculano, 321, 4000-055 Porto, Portugal
  - <sup>6</sup> Department of Chemistry, University of Aveiro, 3810-193 Aveiro, Portugal
  - <sup>7</sup> Department of Chemistry & LAQV, REQUIMTE, University of Aveiro, 3810-193 Aveiro, Portugal
  - <sup>8</sup> CIIMAR—Interdisciplinary Centre of Marine and Environmental Research, 4450-208 Matosinhos, Portugal
  - <sup>9</sup> Department of Chemistry & CICECO—Aveiro Institute of Materials, University of Aveiro, 3810-193 Aveiro, Portugal
- \* Correspondence: cmieiro@ua.pt

### Experimental – characterization

Scanning Transmission Electron Microscopy (STEM) images were recorded with a 200 kV Hitachi SU-70 with Bruker Quantax 400 (B-U) EDS.

STEM analysis showed that silver dispersion (stock suspension) had a spherical appearance with a mean primary size particle diameter of  $21.5 \pm 8.3$  nm (Figure S1).

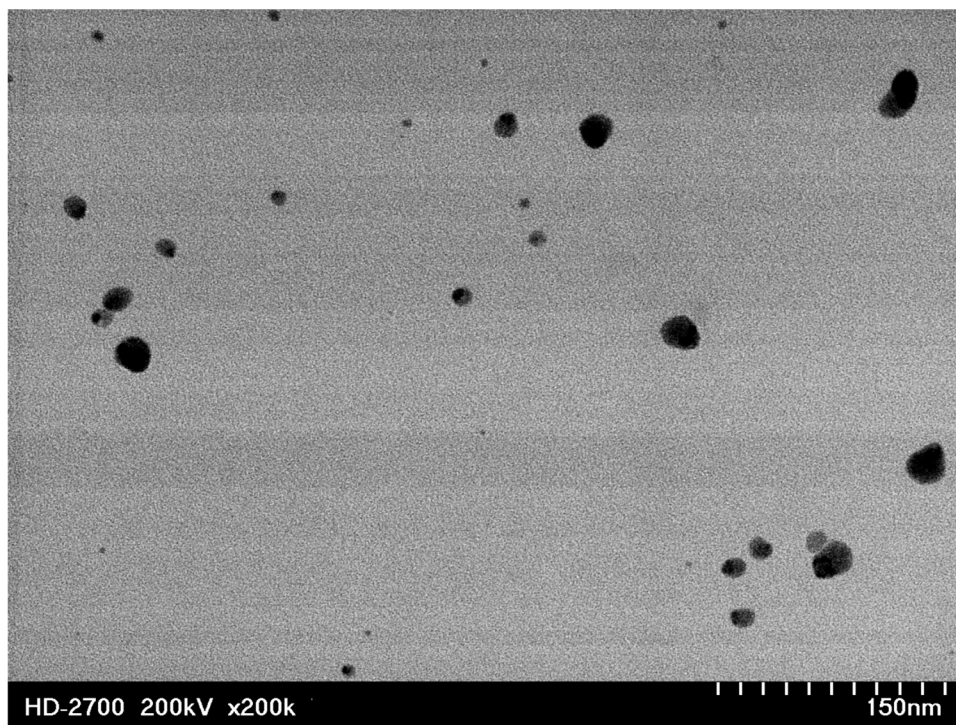

**Figure S1.** Scanning transmission electron microscope (STEM) images of silver nanoparticles (Ag NP) dispersion (stock suspension, scale 150 nm).
